# Supplementary material
Source: ML conference proceedings conference paper supplement (https://proceedings.neurips.cc/paper_files/paper/2022/hash/48fd58527b29c5c0ef2cae43065636e6-Abstract.html)
Supplement: Supplementary file 1 [file 48fd58527b29c5c0ef2cae43065636e6-Supplemental-Conference.pdf]

---

# – Supplementary Material –

## On the Spectral Bias of Convolutional Neural Tangent and Gaussian Process Kernels

---

Amnon Geifman<sup>1</sup>

Meirav Galun<sup>1</sup>

David Jacobs<sup>2</sup>

Ronen Basri<sup>1</sup>

<sup>1</sup>Department of Computer Science, Weizmann Institute of Science, Rehovot, Israel

{amnon.geifman, meirav.galun, ronen.basri}@weizmann.ac.il

<sup>2</sup>Department of Computer Science, University of Maryland, College Park, MD

djacobs@cs.umd.edu

### A Multi-dot product kernels

In this section we prove results presented in Section 3.1.

**Lemma A.1.** *CGPK-EqNet and CNTK-EqNet are multi-dot product kernels.*

*Proof.* The proof follows directly from the derivation of the kernels in Section 2.2. Note that CGPK-EqNet is given by  $\tilde{\Sigma}_{11}^{(L)}$  and CNTK-EqNet by  $\tilde{\Theta}_{11}^{(L)}$ , and their recursive definition only involve elements of  $\tilde{\Sigma}^{(l)}$  and  $\tilde{\Theta}^{(l)}$  in which  $i = j$ . Moreover, by definition the diagonal elements of  $\Sigma^{(0)}$  and  $\Theta^{(0)}$  are  $\langle \mathbf{x}^{(i)}, \mathbf{z}^{(i)} \rangle$  for  $i \in [d]$ , implying the lemma.  $\square$

#### A.1 Multivariate Gegenbauer Polynomials

We next extend basic results derived for functions on the sphere to the multisphere  $\mathbb{MS}(\zeta, d)$ . These results will assist us later to prove Mercer’s decomposition for multi-dot product kernels in the subsequent section.

We consider the set of Gegenbauer polynomials  $\{Q_k^{(\zeta)}(t)\}_{k \geq 0}$  that are orthogonal in  $L_2[-1, 1]$  w.r.t. the weight function  $(1 - t^2)^{(\zeta-3)/2}$  and omit the superscript. Inspired by [4], we define multivariate Gegenbauer polynomials, using facts from harmonic analysis on the sphere. (See references [6, 7] for background on spherical harmonics and Gegenbauer polynomials). We denote by  $|\mathbb{S}^{\zeta-1}|$  the area of the sphere  $\mathbb{S}^{\zeta-1}$ .

**Definition A.2.** For  $k \geq 0$ , let  $Q_k(t) : [-1, 1] \rightarrow \mathbb{R}$  be the (univariate) Gegenbauer polynomial of degree  $k$ . Then, the multivariate Gegenbauer polynomial of order  $\mathbf{k}$  is  $Q_{\mathbf{k}}(\mathbf{t}) : [-1, 1]^d \rightarrow \mathbb{R}$ , defined by

$$Q_{\mathbf{k}}(\mathbf{t}) = Q_{k_1}(t_1) \cdot Q_{k_2}(t_2) \cdot \dots \cdot Q_{k_d}(t_d).$$

These multivariate Gegenbauer polynomials enjoy several properties that they inherit from their univariate counterpart.

**Lemma A.3.** *Let  $P_k(\mathbf{t})$  denote the space of polynomials of degree  $\leq k$  with variables  $\mathbf{t} \in [-1, 1]^d$ . Then, the set  $\{Q_{\mathbf{i}}(\mathbf{t})\}_{\mathbf{i}=0}^{|\mathbf{i}|=k}$  is an orthogonal basis of  $P_k(\mathbf{t})$  w.r.t. the weight function  $(1 - t^2)^{(\zeta-3)/2}$  (with  $\mathbf{i} = (i_1, \dots, i_d)$  and  $|\mathbf{i}| = i_1 + \dots + i_d$ ).*

*Proof.* Let  $p(\mathbf{t}) = \sum_{\mathbf{i}=0}^{|\mathbf{i}|=k} a_{\mathbf{i}} \mathbf{t}^{\mathbf{i}} \in P_k(\mathbf{t})$ . Since the univariate Gegenbauer polynomials form an orthogonal basis, for every  $0 \leq n_i \leq k$  and  $i \in [d]$  we can write  $t_i^{n_i} = \sum_{j=0}^{n_i} a_j^{(n_i)} Q_j(t_i)$ , where

$a_j^{(n_i)} \in \mathbb{R}$ , and the superscript is used to emphasize that the expansion depends on  $n_i$ . Therefore,  $p(\mathbf{t})$  can be written as

$$\begin{aligned} p(\mathbf{t}) &= \sum_{\mathbf{n}=0}^{|\mathbf{n}|=k} a_{\mathbf{n}} \mathbf{t}^{\mathbf{n}} = \sum_{\mathbf{n}=0}^{|\mathbf{n}|=k} a_{\mathbf{n}} \left( \sum_{j=0}^{n_1} a_j^{(n_1)} Q_j(t_1) \right) \cdot \dots \cdot \left( \sum_{j=0}^{n_d} a_j^{(n_d)} Q_j(t_d) \right) \\ &\stackrel{(1)}{=} \sum_{\mathbf{n}=0}^{|\mathbf{n}|=k} \tilde{a}_{\mathbf{n}} Q_{n_1}(t_1) Q_{n_2}(t_2) \cdot \dots \cdot Q_{n_d}(t_d) = \sum_{\mathbf{n}=0}^{|\mathbf{n}|=k} \tilde{a}_{\mathbf{n}} Q_{\mathbf{n}}(\mathbf{t}), \end{aligned}$$

where  $(1)$  is obtained by applying the distributive law with the fact that  $n_1, \dots, n_d \leq k$ . finally,  $\tilde{a}_i$  can be computed explicitly from  $a_i$  and  $\{a_j^{(n_i)}\}$ .

We have shown that  $P_k(\mathbf{t})$  is spanned by the set  $\{Q_{\mathbf{i}}(\mathbf{t})\}_{\mathbf{i}=0}^{|\mathbf{i}|=k}$ . Next, we show that this set is orthogonal with respect to the measure  $\prod_{r=1}^d \left( (1-t_r^2)^{\frac{\zeta-3}{2}} \right)$ . Let  $\mathbf{i}$  and  $\mathbf{j}$  be two vectors of indices. Then, we have that

$$\begin{aligned} \int_{[-1,1]^d} Q_{\mathbf{i}}(\mathbf{t}) Q_{\mathbf{j}}(\mathbf{t}) \prod_{r=1}^d (1-t_r^2)^{\frac{\zeta-3}{2}} dt_1 \cdot \dots \cdot dt_d &= \prod_{r=1}^d \left( \int_{[-1,1]} Q_{i_r}(t_r) Q_{j_r}(t_r) (1-t_r^2)^{\frac{\zeta-3}{2}} dt_r \right) \\ &= \left( \frac{|\mathbb{S}^{\zeta-1}|}{|\mathbb{S}^{\zeta-2}|} \right)^d \left( \prod_{r=1}^d N(\zeta, i_r) \right)^{-1} \delta_{i_1, j_1} \cdot \delta_{i_2, j_2} \cdot \dots \cdot \delta_{i_d, j_d}, \end{aligned}$$

where the last equality is due to the orthogonality property of the univariate Gegenbauer polynomials. This concludes the proof.  $\square$

The relation of the multivariate Gegenbauer polynomials to the SH-products is formulated in the following lemma.

**Lemma A.4.** *Let  $\mathbf{x}, \mathbf{z} \in \mathbb{MS}(\zeta, d)$ . It holds that*

$$Q_{\mathbf{k}}(\langle \mathbf{x}^{(1)}, \mathbf{z}^{(1)} \rangle, \dots, \langle \mathbf{x}^{(i)}, \mathbf{z}^{(j)} \rangle, \dots, \langle \mathbf{x}^{(d)}, \mathbf{z}^{(d)} \rangle) = |\mathbb{S}^{\zeta-1}|^d \left( \prod_{r=1}^d N(\zeta, k_r) \right)^{-1} \sum_{\mathbf{j}: j_r \in [N(\zeta, k_r)]} Y_{\mathbf{k}, \mathbf{j}}(\mathbf{x}) Y_{\mathbf{k}, \mathbf{j}}(\mathbf{z}),$$

where  $Y_{\mathbf{k}, \mathbf{j}}(\mathbf{x})$  is homogeneous polynomial of degree  $k_1 + \dots + k_d$ .  $Y_{\mathbf{k}, \mathbf{j}}(\mathbf{x})$  is further given by SH-products, i.e.,  $Y_{\mathbf{k}, \mathbf{j}}(\mathbf{x}) = \prod_{i=1}^d Y_{k_i, j_i}(\mathbf{x}^{(i)})$ , where  $Y_{k_i, j_i}$  are spherical harmonics in  $\mathbb{S}^{\zeta-1}$ , and  $N(\zeta, k_i)$  are the number of harmonics of frequency  $k_i$  in  $\mathbb{S}^{\zeta-1}$ .

*Proof.* By the definition of the multivariate Gegenbauer polynomials and the univariate addition theorem [9] we get

$$\begin{aligned} Q_{\mathbf{k}}(\langle \mathbf{x}^{(1)}, \mathbf{z}^{(1)} \rangle, \dots, \langle \mathbf{x}^{(i)}, \mathbf{z}^{(j)} \rangle, \dots, \langle \mathbf{x}^{(d)}, \mathbf{z}^{(d)} \rangle) &= Q_{k_1}(\langle \mathbf{x}^{(1)}, \mathbf{z}^{(1)} \rangle) \cdot \dots \cdot Q_{k_d}(\langle \mathbf{x}^{(d)}, \mathbf{z}^{(d)} \rangle) \\ &= \left( \frac{|\mathbb{S}^{\zeta-1}|}{N(\zeta, k_1)} \sum_{j_1=1}^{N(\zeta, k_1)} Y_{k_1, j_1}(\mathbf{x}^{(1)}) Y_{k_1, j_1}(\mathbf{z}^{(1)}) \right) \cdot \dots \cdot \left( \frac{|\mathbb{S}^{\zeta-1}|}{N(\zeta, k_d)} \sum_{j_d=1}^{N(\zeta, k_d)} Y_{k_d, j_d}(\mathbf{x}^{(d)}) Y_{k_d, j_d}(\mathbf{z}^{(d)}) \right) \\ &= \left( \prod_{i=1}^d \frac{|\mathbb{S}^{\zeta-1}|}{N(\zeta, k_i)} \right) \sum_{\mathbf{j}=(1, \dots, 1)}^{\mathbf{j}=(N(\zeta, k_1), \dots, N(\zeta, k_d))} \prod_{i=1}^d Y_{k_i, j_i}(\mathbf{x}^{(i)}) Y_{k_i, j_i}(\mathbf{z}^{(i)}) \\ &:= \left( \prod_{i=1}^d \frac{|\mathbb{S}^{\zeta-1}|}{N(\zeta, k_i)} \right) \sum_{\mathbf{j}: j_i \in [N(\zeta, k_i)]} Y_{\mathbf{k}, \mathbf{j}}(\mathbf{x}) Y_{\mathbf{k}, \mathbf{j}}(\mathbf{z}). \end{aligned}$$

Note that the homogeneity of the SH-products  $Y_{\mathbf{k}, \mathbf{j}}(\mathbf{x})$  is a direct result of the homogeneity of the spherical harmonics  $Y_{k_i, j_i}$ .  $\square$

**Lemma A.5.** *The set  $\{Y_{\mathbf{k}, \mathbf{j}}\}$  are orthonormal w.r.t uniform measure in  $\mathbb{MS}(\zeta, d)$ .*

*Proof.* We have that

$$\begin{aligned} \int_{\mathbb{MS}(\zeta, d)} Y_{\mathbf{k}, \mathbf{j}}(\mathbf{x}) Y_{\mathbf{k}', \mathbf{j}'}(\mathbf{x}) d\mathbf{x} &= \int_{\mathbb{MS}(\zeta, d)} \left( \prod_{i=1}^d Y_{k_i, j_i}(\mathbf{x}^{(i)}) \right) \left( \prod_{i=1}^d Y_{k'_i, j'_i}(\mathbf{x}^{(i)}) \right) d\mathbf{x} \\ &= \prod_{i=1}^d \left( \int_{\mathbb{S}^{\zeta-1}} Y_{k_i, j_i}(\mathbf{x}^{(i)}) Y_{k'_i, j'_i}(\mathbf{x}^{(i)}) d\mathbf{x}^{(i)} \right) = \prod_{i=1}^d \delta_{k_i, k'_i} \cdot \delta_{j_i, j'_i}. \end{aligned}$$

□

## A.2 Mercer's decomposition

In this section we prove that the eigenfunctions of multi dot-product kernels consist of products of spherical harmonics. We further provide a way to calculate the eigenvalues using products of Gegenbauer polynomials.

**Lemma A.6.** *Let  $\tilde{\mathbf{k}}$  be a multi-dot product kernel. Then, the eigenfunctions of  $\tilde{\mathbf{k}}(\mathbf{x}, \cdot)$  w.r.t uniform measure on  $\mathbb{MS}(\zeta, d)$  are the SH-products. Namely, the eigenfunctions are*

$$\left\{ Y_{\mathbf{k}, \mathbf{j}}(\mathbf{x}) = \prod_{i=1}^d Y_{k_i, j_i}(\mathbf{x}^{(i)}) \right\}_{\mathbf{k} \geq 0, \mathbf{j}_i \in [N(\zeta, k_i)]},$$

where  $Y_{k_i, j_i}$  are the Spherical Harmonics in  $\mathbb{S}^{\zeta-1}$ , and  $N(\zeta, k_i)$  are the number of harmonics of frequency  $k_i$  in  $\mathbb{S}^{\zeta-1}$ . The eigenvalues,  $\lambda_{\mathbf{k}}$ , can be calculated using products of (univariate) Gegenbauer polynomials as follows,

$$\lambda_{\mathbf{k}} = C(\zeta, d) \int_{[-1, 1]^d} \tilde{\mathbf{k}}(\mathbf{t}) \prod_{i=1}^d Q_{k_i}(t_i) (1 - t_i^2)^{\frac{\zeta-3}{2}} dt$$

where  $\{Q_k(t)\}$  is the set of orthogonal Gegenbauer polynomials w.r.t the weights  $(1 - t_i^2)^{\frac{\zeta-3}{2}}$ , and  $C(\zeta, d)$  is a constant that depends on both  $\zeta$  and  $d$ .

*Proof.* Let  $\tilde{\mathbf{k}}$  be a multi-dot product kernel. By definition for such kernel, there exists a multivariate analytic function  $\kappa$  such that  $\tilde{\mathbf{k}}^{(L)}(\mathbf{x}, \mathbf{z}) = \kappa(\langle \mathbf{x}^{(1)}, \mathbf{z}^{(1)} \rangle, \dots, \langle \mathbf{x}^{(d)}, \mathbf{z}^{(d)} \rangle)$ . Using lemma A.3,  $\{Q_{\mathbf{k}}\}$  form an orthogonal basis in  $[-1, 1]^d$ . Therefore, it can be readily shown (similar to [9]) that,  $\kappa$  can be written as

$$\kappa(t_1, \dots, t_d) := \kappa(\mathbf{t}) = \sum_{\mathbf{k} \geq 0} \left( \prod_{i=1}^d N(\zeta, k_i) \frac{|\mathbb{S}^{\zeta-2}|}{|\mathbb{S}^{\zeta-1}|} \right) Q_{\mathbf{k}}(\mathbf{t}) \int_{[-1, 1]^d} \kappa(\tilde{\mathbf{t}}) Q_{\mathbf{k}}(\tilde{\mathbf{t}}) \prod_{i=1}^d (1 - \tilde{t}_i^2)^{\frac{\zeta-3}{2}} d\tilde{\mathbf{t}} := \sum_{\mathbf{k} \geq 0} \lambda_{\mathbf{k}} Q_{\mathbf{k}}(\mathbf{t}).$$

Lemma A.4 implies

$$Q_{\mathbf{k}}(\langle \mathbf{x}^{(1)}, \mathbf{z}^{(1)} \rangle, \dots, \langle \mathbf{x}^{(i)}, \mathbf{z}^{(j)} \rangle, \dots, \langle \mathbf{x}^{(d)}, \mathbf{z}^{(d)} \rangle) = \frac{|\mathbb{S}^{\zeta-1}|^d}{\prod_{i=1}^d N(\zeta, k_i)} \sum_{\mathbf{j}: \mathbf{j}_i \in [N(\zeta, k_i)]} Y_{\mathbf{k}, \mathbf{j}}(\mathbf{x}) Y_{\mathbf{k}, \mathbf{j}}(\mathbf{z}),$$

yielding

$$\tilde{\mathbf{k}}(\mathbf{x}, \mathbf{z}) = \sum_{\mathbf{k} \geq 0} \lambda_{\mathbf{k}} \sum_{\mathbf{j}: \mathbf{j}_i \in [N(\zeta, k_i)]} Y_{\mathbf{k}, \mathbf{j}}(\mathbf{x}) Y_{\mathbf{k}, \mathbf{j}}(\mathbf{z}).$$

Since  $\{Y_{\mathbf{k}, \mathbf{j}}(\mathbf{x})\}$  are orthonormal w.r.t. the uniform measure in  $\mathbb{MS}(\zeta, d)$  (Lemma A.5) we obtain that  $\{Y_{\mathbf{k}, \mathbf{j}}(\mathbf{x})\}$  are the eigenfunctions of  $\tilde{\mathbf{k}}^{(L)}$ , with the corresponding eigenvalues  $\{\lambda_{\mathbf{k}} = |\mathbb{S}^{\zeta-2}|^d \int_{[-1, 1]^d} \tilde{\mathbf{k}}(\mathbf{t}) \prod_{i=1}^d Q_{k_i}(t_i) (1 - t_i^2)^{\frac{\zeta-3}{2}} dt\}$ . □

## A.3 Proof of Lemma 3.1

**Lemma A.7.** *Let  $\tilde{\mathbf{k}}$  be a multi-dot product kernel with the power series given in (2), where  $\mathbf{x}^{(i)}, \mathbf{z}^{(i)} \in \mathbb{S}^{\zeta-1}$  respectively are pixels in  $\mathbf{x}, \mathbf{z}$ . Then, the eigenvalues  $\lambda_{\mathbf{k}}(\tilde{\mathbf{k}})$  of  $\tilde{\mathbf{k}}$  are given by  $\lambda_{\mathbf{k}}(\tilde{\mathbf{k}}) =$*

$|\mathbb{S}^{\zeta-2}|^d \sum_{\mathbf{s} \geq 0} b_{\mathbf{k}+2\mathbf{s}} \prod_{i=1}^d \lambda_{k_i}(t^{k_i+2s_i})$ , where  $|\mathbb{S}^{\zeta-2}|$  is the surface area of  $\mathbb{S}^{\zeta-2}$ , and  $\lambda_k(t^n)$  is the  $k$ 'th eigenvalue of  $t^n$ , given by

$$\lambda_k(t^n) = \frac{n!}{(n-k)!2^{k+1}} \frac{\Gamma\left(\frac{\zeta-1}{2}\right) \Gamma\left(\frac{n-k+1}{2}\right)}{\Gamma\left(\frac{n-k+\zeta}{2}\right)}$$

if  $n-k$  is even and non-negative, while  $\lambda_k(t^n) = 0$  otherwise, and  $\Gamma$  is the Gamma function.

*Proof.* The proof follows the linearity of the integral operator. Let

$$\tilde{\mathbf{k}}(\mathbf{x}, \mathbf{z}) = \sum_{\mathbf{n} \geq 0} b_{\mathbf{n}} \langle \mathbf{x}^{(1)}, \mathbf{z}^{(1)} \rangle^{n_1} \cdot \dots \cdot \langle \mathbf{x}^{(d)}, \mathbf{z}^{(d)} \rangle^{n_d}, \quad (1)$$

and denote by  $C(\zeta, d) = |\mathbb{S}^{\zeta-2}|^d$ . Following Lemma A.6 the eigenvalues of  $\tilde{\mathbf{k}}$  are given by

$$\begin{aligned} \lambda_{\mathbf{k}} &= C(\zeta, d) \int_{[-1,1]^d} \tilde{\mathbf{k}}(\mathbf{t}) \prod_{i=1}^d Q_{k_i}(t_i) (1-t_i^2)^{\frac{\zeta-3}{2}} dt_1 \dots dt_d \\ &= C(\zeta, d) \int_{[-1,1]^d} \sum_{\mathbf{n} \geq 0} b_{\mathbf{n}} \mathbf{t}^{\mathbf{n}} \prod_{i=1}^d Q_{k_i}(t_i) (1-t_i^2)^{\frac{\zeta-3}{2}} dt_1 \dots dt_d \\ &= C(\zeta, d) \sum_{\mathbf{n} \geq 0} b_{\mathbf{n}} \prod_{i=1}^d \left( \int_{[-1,1]} t_i^{n_i} Q_{k_i}(t_i) (1-t_i^2)^{\frac{\zeta-3}{2}} dt_i \right) = C(\zeta, d) \sum_{\mathbf{n} \geq 0} b_{\mathbf{n}} \prod_{i=1}^d \lambda_{k_i}(t^{n_i}). \end{aligned}$$

Also note from [1] that  $\lambda_k(t^n) = 0$  whenever  $n-k$  is either odd or negative, implying the statement of the lemma.  $\square$

A consequence of the lemma above is that the eigenvalues of a kernel  $\tilde{\mathbf{k}}$  can be bounded by the eigenvalues of other kernels if the power series coefficients of  $\tilde{\mathbf{k}}$  are bounded by the respective coefficients of the other kernels. We summarize this in the following corollary:

**Corollary A.8.** Let  $\tilde{\mathbf{k}}, \tilde{\mathbf{k}}^{upper}, \tilde{\mathbf{k}}^{lower} : \mathbb{MS}(\zeta, d) \rightarrow \mathbb{R}$  be multi-dot product kernels. Assuming that for  $\mathbf{t} \in [-1, 1]^d$ ,

$$\begin{aligned} \tilde{\mathbf{k}}(\mathbf{t}) &= \sum_{\mathbf{n}} b_{\mathbf{n}} \mathbf{t}^{\mathbf{n}} \\ \tilde{\mathbf{k}}^{upper}(\mathbf{t}) &= \sum_{\mathbf{n}} b_{\mathbf{n}}^{upper} \mathbf{t}^{\mathbf{n}} \\ \tilde{\mathbf{k}}^{lower}(\mathbf{t}) &= \sum_{\mathbf{n}} b_{\mathbf{n}}^{lower} \mathbf{t}^{\mathbf{n}} \end{aligned}$$

and suppose there exists  $\mathbf{k}_0$  such that for all  $\mathbf{n} \geq \mathbf{k}_0$ ,  $0 \leq c_1 b_{\mathbf{n}}^{lower} \leq b_{\mathbf{n}} \leq c_2 b_{\mathbf{n}}^{upper}$ , with  $c_1, c_2 > 0$ . Then, for all  $\mathbf{k} \geq \mathbf{k}_0$ ,

$$c_1 \lambda_{\mathbf{k}}(\tilde{\mathbf{k}}^{lower}) \leq \lambda_{\mathbf{k}}(\tilde{\mathbf{k}}) \leq c_2 \lambda_{\mathbf{k}}(\tilde{\mathbf{k}}^{upper}) \quad (2)$$

This corollary is an immediate result from Lemma 3.1.

## B Factorizable kernels

In this section we prove results presented in Section 3.2. We prove Theorem 3.2, which determines the eigenvalues of factorizable kernels whose power series coefficients decay at a polynomial rate. The following supporting lemma proves the theorem for  $d = 1$ .

**Lemma B.1.** Let  $\tilde{\kappa}(t) = \sum_{n=0}^{\infty} \tilde{a}_n t^n$  where  $\tilde{a}_n = O(n^{-\nu})$  with  $\nu > 1$  and not integer. Then, the eigenvalues of  $\tilde{\kappa}$  w.r.t. the uniform measure in  $\mathbb{S}^{\zeta-1}$  are

$$\lambda_k = \Theta\left(k^{-(\zeta+2\nu-3)}\right).$$

*Proof.* By applying Corollary A.8 with  $d = 1$  we have that if  $f(t) = \sum_{n=0}^{\infty} a_n t^n$  and  $g(t) = \sum_{n=0}^{\infty} b_n t^n$  with  $c_1 a_n \leq b_n \leq c_2 a_n$  then it holds that  $\lambda_k(g) = \Theta(\lambda_k(f))$ . It is therefore enough to find  $f(t) = \sum_{n=0}^{\infty} \tilde{a}_n t^n$  where  $\tilde{a}_n = O(n^{-\nu})$  and then calculate its eigenvalues. By [5] (Thm. VI.1, page 381), the function  $f(t) = (1-t)^{\nu-1}$ , where  $\nu > 1$  is non-integer, satisfies  $f(t) = \sum_{n=0}^{\infty} \tilde{a}_n t^n$  with  $\tilde{a}_n = O(n^{-\nu})$ . Moreover, according to [2] (Thm. 7, page 17), the eigenvalues of  $f(t) = (1-t)^{\nu-1}$  in  $\mathbb{S}^{\zeta-1}$  are

$$\lambda_k(f) = c_1 k^{-(\zeta+2\nu-3)},$$

which concludes the proof.  $\square$

Relying on the lemma, we can now prove Theorem 3.2.

**Theorem B.2.** *Let  $\mathbf{k}$  be a factorizable multi-dot product kernel, and let  $\mathcal{R} \subseteq [d]$  denote its receptive field. Suppose that  $\mathbf{k}$  can be written as a multivariate power series,  $\mathbf{k}(\mathbf{t}) = \sum_{\mathbf{n} \geq 0} b_{\mathbf{n}} \mathbf{t}^{\mathbf{n}}$  with*

$$b_{\mathbf{n}} \sim c \prod_{i \in \mathcal{R}, n_i > 0} n_i^{-\nu}.$$

*with constants  $c > 0$ , non-integer  $\nu > 1$ , and  $b_{\mathbf{n}} = 0$  if  $n_i > 0$  for any  $i \notin \mathcal{R}$ . Then the eigenfunctions of  $\mathbf{k}$  w.r.t. the uniform measure are the SH-products, and its eigenvalues  $\lambda_{\mathbf{k}}(\mathbf{k})$  satisfy*

$$\lambda_{\mathbf{k}} \sim \tilde{c} \prod_{i \in \mathcal{R}, k_i > 0} k_i^{-(\zeta+2\nu-3)},$$

*where  $\mathbf{k} \in \mathbb{N}^d$  be a vector of frequencies. Finally,  $\lambda_{\mathbf{k}} = 0$  if  $k_i > 0$  for any  $i \notin \mathcal{R}$ .*

*Proof.* Since  $\mathbf{k}(\mathbf{t})$  is factorizable and can be written by a power series it can be written as

$$\mathbf{k}(\mathbf{t}) = c \tilde{\kappa}(t_1) \cdot \dots \cdot \tilde{\kappa}(t_d),$$

where  $\tilde{\kappa}(t) \sim \sum_{n=0}^{\infty} n^{-\nu} t^n$ , and it can be readily shown that

$$\lambda_{\mathbf{k}}(\mathbf{k}) = c \lambda_{k_1}(\tilde{\kappa}) \cdot \dots \cdot \lambda_{k_d}(\tilde{\kappa}).$$

Using Lemma B.1 we have that

$$c \lambda_{k_1}(\tilde{\kappa}) \cdot \dots \cdot \lambda_{k_d}(\tilde{\kappa}) \sim \tilde{c} \prod_{i \in \mathcal{R}, k_i > 0} k_i^{-(\zeta+2\nu-3)},$$

which concludes our proof.  $\square$

## C Positional bias of eigenvalues

We next prove results presented in Section 3.3. We next prove Theorem 3.4.

**Theorem C.1.** *Let  $\mathbf{k}^{(L)}$  be hierarchical and factorizable of depth  $L > 1$  with filter size  $q$ , so that  $\mathbf{k}^{(L)}(\mathbf{t}) = \sum_{\mathbf{n} \geq 0} b_{\mathbf{n}} \mathbf{t}^{\mathbf{n}} = c \sum_{\mathbf{n} \geq 0} a_{n_1} \cdot \dots \cdot a_{n_d} \mathbf{t}^{\mathbf{n}}$  with  $a_0 > 0$  and  $a_{n_i} = n_i^{-\nu}$  for  $\nu > 1$ . Then there exist a scalar  $A = 1 + \frac{1}{a_0}$  such that:*

1. *The power series coefficients of  $\mathbf{k}^{(L)}$  satisfy*

$$c_{A,\mathbf{n}} n^{-\nu} \leq b_{\mathbf{n}},$$

*where*

$$c_{A,\mathbf{n}} = c_L \prod_{i=1}^d A^{\min(p_i^{(L)}, n_i)}.$$

2. The eigenvalues  $\lambda_{\mathbf{k}}(\tilde{\mathbf{k}}^{(L)})$  satisfy

$$c_{A,\mathbf{k}} \prod_{\substack{i=1 \\ n_i > 0}}^d k_i^{-(\zeta+2\nu-3)} \leq \lambda_{\mathbf{k}},$$

where

$$c_{A,\mathbf{k}} = \tilde{c}_L \prod_{i=1}^d A^{\min(p_i^{(L)}, k_i)}.$$

$c_L$  and  $\tilde{c}_L$  are constants that depends on  $L$ , and  $p_i^{(L)}$  denotes the number of paths from pixel  $i$  to the output of  $\tilde{\mathbf{k}}^{(L)}$ .

To prove the theorem we provide several supporting lemmas and the following definition:

**Definition C.2.** A kernel  $\tilde{\mathbf{k}}^{(L)} : [-1, 1]^{q^L} \rightarrow \mathbb{R}$  is called stride- $q$  hierarchical of depth  $L > 1$  if there exists a sequence of kernels  $\tilde{\mathbf{k}}^{(1)}, \dots, \tilde{\mathbf{k}}^{(L)}$  such that  $\tilde{\mathbf{k}}^{(L)}(\mathbf{t}) = f\left(\tilde{\mathbf{k}}^{(L-1)}(\mathbf{t}_1), \dots, \tilde{\mathbf{k}}^{(L-1)}(\mathbf{t}_q)\right)$  with  $f : \mathbb{R}^q \rightarrow \mathbb{R}$ ,  $\mathbf{t} = (\mathbf{t}_1, \dots, \mathbf{t}_q) \in [-1, 1]^{q^{L-1}}$  and  $\tilde{\mathbf{k}}^{(1)}(t) = t \in [-1, 1]$ . A kernel  $\tilde{\mathbf{k}}^{(L)} : [-1, 1]^{q^{L-1}+1} \rightarrow \mathbb{R}$  is stride-1 hierarchical if for all  $1 < l \leq L$ ,  $\tilde{\mathbf{k}}^{(l)} = f\left(\tilde{\mathbf{k}}^{(l-1)}(\mathbf{t}_1), \tilde{\mathbf{k}}^{(l-1)}(s_1 \mathbf{t}_1), \dots, \tilde{\mathbf{k}}^{(l-1)}(s_{q-1} \mathbf{t}_1)\right)$  and  $\mathbf{t}_1 \in [-1, 1]^{l(q-1)+1}$ .

We next formulate the relation between the power series coefficient of the two kernels:

**Lemma C.3.** Let  $\tilde{\mathbf{k}}^{(L)}(\mathbf{t}) : [-1, 1]^d \rightarrow \mathbb{R}$  be stride-1 kernel and  $\tilde{\mathbf{k}}^{(L)}(\tilde{\mathbf{t}}) : [-1, 1]^{q^L} \rightarrow \mathbb{R}$  be stride- $q$  kernel. Then, there exists a variables substitution  $S : [q^L] \rightarrow [d]$  such that if  $t_{S(j)} = t_j$  for all  $j \in [q^L]$  then

$$\tilde{\mathbf{k}}^{(L)}(t_{S(0)}, \dots, t_{S(q^L-1)}) \equiv \tilde{\mathbf{k}}^{(L)}(t_0, \dots, t_{d-1}).$$

Moreover, if  $\tilde{\mathbf{k}}^{(L)}(\mathbf{t}) = \sum_{\mathbf{n} \geq 0} b_{\mathbf{n}} \mathbf{t}^{\mathbf{n}}$  and  $\tilde{\mathbf{k}}^{(L)}(\tilde{\mathbf{t}}) = \sum_{\tilde{\mathbf{n}} \geq 0} \tilde{b}_{\tilde{\mathbf{n}}} \tilde{\mathbf{t}}^{\tilde{\mathbf{n}}}$  then

$$b_{\mathbf{n}} = \sum_{\mathcal{S}} \tilde{b}_{\tilde{\mathbf{n}}}$$

where  $\mathcal{S} = \{\tilde{n}_0, \dots, \tilde{n}_{q^L-1} | \forall i = 0, \dots, d-1, \sum_{i=S(j)} \tilde{n}_j = n_i\}$ .

*Proof.* We assume here that  $d \leq (q-1)L$ , in any other case can take  $\text{mod}(d)$ . We construct the mapping  $S$  and prove its correctness by induction. For any index  $j = 0, \dots, q^L - 1$  we write  $j = a_{L-1}q^{L-1} + a_{L-2}q^{L-2} + \dots + a_1q + a_0$  where  $a_i = 0, 1, \dots, q-1$ . Then, we define  $S(j) := S_L(j) = a_{L-1} + a_{L-2} + \dots + a_0$ . We next prove by induction that  $\tilde{\mathbf{k}}^{(L)}(t_{S(0)}, \dots, t_{S(q^L-1)}) \equiv \tilde{\mathbf{k}}^{(L)}(t_0, \dots, t_{d-1})$ . For  $L = 2$  we have:

$$\begin{aligned} \tilde{\mathbf{k}}^{(2)}(t_{S(0)}, \dots, t_{S(q^2-1)}) &= f\left(\tilde{\mathbf{k}}^{(1)}(t_{S(0)}, \dots, t_{S(q-1)}), \dots, \tilde{\mathbf{k}}^{(1)}(t_{S((q-1)q)}, \dots, t_{S(q^2-1)})\right) \\ &= f\left(\tilde{\mathbf{k}}^{(1)}(t_0, \dots, t_{q-1}), \dots, \tilde{\mathbf{k}}^{(1)}(t_{q-1}, \dots, t_{2q-2})\right) = f\left(\tilde{\mathbf{k}}^{(1)}(\mathbf{t}), \tilde{\mathbf{k}}^{(1)}(s_1 \mathbf{t}), \dots, \tilde{\mathbf{k}}^{(1)}(s_{q-1} \mathbf{t})\right) \end{aligned}$$

Where  $\mathbf{t} = t_0, \dots, t_{q-1}$  and  $s$  is the shift operator. This concludes the case of  $L = 2$ . For  $L > 2$  we assume that  $S_{L-1}(j) = a_{L-2} + \dots + a_0$  is the correct assignment for  $q^{L-1} - 1$  variables and get that

$$\begin{aligned} \tilde{\mathbf{k}}^{(L)}(t_{S(0)}, \dots, t_{S(q^L-1)}) &= f\left(\tilde{\mathbf{k}}^{(L-1)}(t_{S(0)}, \dots, t_{S((q-1)q^{L-2} + \dots + q-1)}), \dots, \tilde{\mathbf{k}}^{(L-1)}(t_{S((q-1)q^{L-1})}, \dots, t_{S(q^L-1)})\right) \\ &= f\left(\tilde{\mathbf{k}}^{(L-1)}(t_0, \dots, t_{(L-1)(q-1)}), \dots, \tilde{\mathbf{k}}^{(L-1)}(t_{(q-1)}, \dots, t_{L(q-1)})\right) \\ &= f\left(\tilde{\mathbf{k}}^{(L-1)}(\mathbf{t}), \dots, \tilde{\mathbf{k}}^{(L-1)}(s_{q-1} \mathbf{t})\right), \end{aligned}$$

where <sup>(1)</sup> holds from the induction hypothesis and  $\mathbf{t} = t_0, \dots, t_{(L-1)(q-1)}$ . Therefore

$$\tilde{\mathbf{k}}^{(L)}(t_{S(0)}, \dots, t_{S(q^L-1)}) \equiv \mathbf{k}^{(L)}(t_0, \dots, t_{d-1}).$$

Finally since  $f$  is an analytic function it holds that:

$$\mathbf{k}^{(L)}(\mathbf{t}) = \tilde{\mathbf{k}}^{(L)}(t_{S(0)}, \dots, t_{S(q^L-1)}) = \sum_{\tilde{\mathbf{n}} \geq 0} \tilde{b}_{\tilde{\mathbf{n}}} t_{S(0)}^{\tilde{n}_1} \cdot \dots \cdot t_{S(q^L-1)}^{\tilde{n}_{q^L-1}} = \sum_{\mathbf{n} \geq 0} \mathbf{t}^{\mathbf{n}} \sum_{\mathcal{S}} \tilde{b}_{\tilde{\mathbf{n}}}$$

where  $\mathcal{S} = \{\tilde{n}_0, \dots, \tilde{n}_{q^L-1} | \forall i = 0, \dots, d-1, \sum_{i=S(j)} \tilde{n}_j = n_i\}$ . Therefore, from the uniqueness of the power series we get that

$$b_{\mathbf{n}} = \sum_{\mathcal{S}} \tilde{b}_{\tilde{\mathbf{n}}}.$$

□

**Lemma C.4.** Let  $\mathbf{k} \in \mathbb{N}^m$  and consider the series  $S_m(n) = \sum_{k_1 + \dots + k_m = n} \prod_{i=1}^m k_i^{-\nu} = \sum_{|\mathbf{k}|=n} \mathbf{k}^{-\nu}$  with  $\nu > 1$  and the convention  $0^{-\nu} = a_0 > 0$ . Then, for  $n \geq m$ ,  $S_m(n)$  is bounded from above and below as follows

$$A^{m-1} n^{-\nu} \leq S_m(n) \leq B^{m-1} n^{-\nu}, \quad (3)$$

with  $B > A = (a_0 + 1) > 1$  constants.

*Proof.* We show this by induction over  $m$ , i.e., the length of the vector  $\mathbf{k}$ . We begin by showing this for  $S = S_2(n)$  for any  $n \geq 2$ , i.e.,  $An^{-\nu} \leq S = \sum_{k=0}^n k^{-\nu}(n-k)^{-\nu} \leq Bn^{-\nu}$  for constants  $A$  and  $B$ .

**Lower bound.** For  $n > 2$  it holds that

$$\begin{aligned} S &= \sum_{k=0}^n k^{-\nu}(n-k)^{-\nu} = 2 \cdot a_0 \cdot n^{-\nu} + 2 \cdot (n-1)^{-\nu} + \sum_{k=2}^{n-2} k^{-\nu}(n-k)^{-\nu} \\ &\geq 2 \cdot a_0 \cdot n^{-\nu} + 2 \cdot (n-1)^{-\nu} \\ &\geq 2(a_0 + 1)n^{-\nu} \geq (2a_0 + 1)n^{-\nu} \\ &\geq (a_0 + 1)n^{-\nu}. \end{aligned}$$

For  $n = 2$ , we have that  $S = 2a_0 n^{-\nu} + (n-1)^{-\nu} \geq (2a_0 + 1)n^{-\nu} \geq (a_0 + 1)n^{-\nu}$ .

Therefore, it holds for  $n \geq 2$  that  $S_2(n) \geq A n^{-\nu}$ , where  $A = a_0 + 1$ .

**Upper bound.** We show that for  $n \geq 2$  it holds that  $n^\nu S_2(n) = n^\nu \sum_{k=0}^n k^{-\nu}(n-k)^{-\nu} \leq (2a_0 + 2) + \frac{2^{(\nu+1)}}{\nu-1}$ . This follows from:

$$\begin{aligned} n^\nu \sum_{k=0}^n k^{-\nu}(n-k)^{-\nu} &\leq (2a_0 + 2^{\nu+1}) + \sum_{k=2}^{n-2} \left( \frac{n-k+k}{k(n-k)} \right)^\nu = (2a_0 + 2^{\nu+1}) + \sum_{k=2}^{n-2} \left( \frac{n-k}{k(n-k)} + \frac{k}{k(n-k)} \right)^\nu \\ &= (2a_0 + 2^{\nu+1}) + \sum_{k=2}^{n-2} \left( \frac{1}{k} + \frac{1}{(n-k)} \right)^\nu \leq (2a_0 + 2^{\nu+1}) + \sum_{k=2}^{n-2} \left( 2 \max \left\{ \frac{1}{k}, \frac{1}{n-k} \right\} \right)^\nu \leq (2a_0 + 2^{\nu+1}) + 2^\nu 2 \sum_{k=2}^{n/2} k^{-\nu}. \end{aligned}$$

Note that  $f(k) = k^{-\nu}$  is monotonically decreasing and therefore can be bounded by the integral

$$\sum_{k=2}^{n/2} k^{-\nu} \leq \int_1^{n/2} \frac{1}{x^\nu} dx = \frac{1}{\nu-1} - \left( \frac{2}{n} \right)^{\nu-1} \frac{1}{\nu-1} \leq \frac{1}{\nu-1}$$

So overall we have that  $n^\nu S_2(n) \leq 2a_0 + 2^{\nu+1} + \frac{2^{(\nu+1)}}{\nu-1}$  implying that  $S_2(n) \leq B n^{-\nu}$  with  $B = 2a_0 + 2^{\nu+1} + \frac{2^{(\nu+1)}}{\nu-1}$ .

**Induction step.** We next use induction to prove the lemma for  $S_m(n)$  for  $m > 2$  and  $n \geq m$ . Assume the lemma holds for  $S_m$ , i.e.,  $A^{m-1}n^{-\nu} \leq S_m(n) \leq B^{m-1}n^{-\nu}$  for  $n \geq m$  and  $A = a_0 + 1 > 1$ , we aim to prove this for  $S_{m+1}(n)$  for  $n \geq m + 1$ .

$$S_{m+1}(n) = \sum_{k_1=0}^n k_1^{-\nu} \sum_{k_2+\dots+k_{m+1}=n-k_1} k_2^{-\nu} \dots k_{m+1}^{-\nu}.$$

Using the induction assumption, we obtain

$$\begin{aligned} S_{m+1}(n) &= \sum_{k_1=0}^n k_1^{-\nu} \sum_{k_2+\dots+k_{m+1}=n-k_1} k_2^{-\nu} \dots k_{m+1}^{-\nu} \\ &\geq a_0 \sum_{k_2+\dots+k_{m+1}=n} k_2^{-\nu} \dots k_{m+1}^{-\nu} + \sum_{k_2+\dots+k_{m+1}=n-1} k_2^{-\nu} \dots k_{m+1}^{-\nu} \\ &\geq a_0 A^{m-1}n^{-\nu} + A^{m-1}(n-1)^{-\nu} \geq (a_0 + 1)^m n^{-\nu} = A^m n^{-\nu}. \end{aligned}$$

Note that in the two sums above the induction assumption holds since  $n \geq n-1 \geq m$ . This concludes the proof for the lower bound. The proof for the upper bound proceeds in a similar way.  $\square$

**Lemma C.5.** Let  $\mathbf{k} \in \mathbb{N}^m$  and consider the series  $S_m(n) = \sum_{|\mathbf{k}|=n} \mathbf{k}^{-\nu}$  with  $\nu > 1$  and the convention  $0^{-\nu} = a_0 > 0$ . Then, for  $2 \leq n \leq m$ ,  $S_m(n)$  is bounded from above and below as follows.

$$a_0^{m-n} A^{n-1} n^{-\nu} \leq S_m(n) \leq a_0^{m-n} \left( \frac{m \cdot e}{n} \right)^n B^{n-1} n^{-\nu}, \quad (4)$$

where  $A, B$  are given in Lemma C.4. Note that for  $m = n$  the lower bound boils down to the lower bound in Lemma C.4.

*Proof.* We next prove the lemma for  $2 \leq n \leq m$ .

$$S_m(n) = \sum_{k_1+\dots+k_m=n} k_1^{-\nu} \dots k_m^{-\nu} \geq a_0^{m-n} \sum_{k_1+\dots+k_n=n} k_1^{-\nu} \dots k_n^{-\nu} \geq a_0^{m-n} A^{n-1} n^{-\nu},$$

where the last inequality holds from Lemma C.4 with  $n = m$ .

For the upper bound we have

$$\begin{aligned} S_m(n) &= \sum_{k_1+\dots+k_m=n} k_1^{-\nu} \dots k_m^{-\nu} \leq^{(1)} a_0^{m-n} \binom{m}{n} \sum_{k_1+\dots+k_n=n} k_1^{-\nu} \dots k_n^{-\nu} \\ &\leq^{(2)} a_0^{m-n} \binom{m}{n} B^{n-1} n^{-\nu} \leq a_0^{m-n} \left( \frac{m \cdot e}{n} \right)^n B^{n-1} n^{-\nu}, \end{aligned}$$

where  $^{(1)}$  considers subsets of size  $n$  and sets the remaining orders  $k_i$  to zero. Note that since  $n \leq m$  this covers all the options of satisfying the sum  $k_1 + \dots + k_m = n$  (with some repetitions).  $^{(2)}$  uses the bound of Lemma C.4.  $\square$

**Lemma C.6.** Let  $\mathbf{k}^{(L)}$  be an hierarchical factorizable kernel of depth  $L$  and filter size  $q$ , where  $\mathbf{k}^{(L)}(\mathbf{t}) = \sum_{\mathbf{n} \geq 0} b_{\mathbf{n}} \mathbf{t}^{\mathbf{n}} = c \sum_{\mathbf{n} \geq 0} a_{n_1} \dots a_{n_d} \mathbf{t}^{\mathbf{n}}$  with  $a_0 > 0$  and  $a_{n_i} = n_i^{-\nu}$  for  $\nu > 1$ . Then, the Taylor coefficients of  $\mathbf{k}^{(L)}$  satisfy

$$c_{A,\mathbf{n}} \mathbf{n}^{-\nu} \leq b_{\mathbf{n}} \leq c_{B,\mathbf{n}} \mathbf{n}^{-\nu}$$

where

$$c_{A,\mathbf{n}} = c_L \prod_{i=1}^d \bar{A}^{\min(p_i^{(L)}, n_i)}$$

and  $c_{B,\mathbf{n}} = \bar{c}_L \prod_{i=1}^d c_B(p_i^{(L)}, n_i)$

$$c_B(p_i^{(L)}, n_i) = \begin{cases} \left( \frac{p_i^{(L)} \cdot e}{n_i} \right)^{n_i} B^{n_i}, & 1 \leq n_i < p_i^{(L)} \\ B^{p_i^{(L)}}, & n_i \geq p_i^{(L)} \end{cases}$$

with  $B \geq \bar{A} = 1 + \frac{1}{a_0}$  and  $c_L, \bar{c}_L$  are constants.  $p_i^{(L)}$  denotes the number of paths from pixel  $j$  to the output of the corresponding equivariant network.

*Proof.* Since  $\tilde{\mathbf{k}}^{(L)}$  is factorizable we can use the hierarchical stride  $q$  kernel  $\tilde{\mathbf{k}}^{(L)}(\tilde{\mathbf{t}})$  and write:

$$\tilde{\mathbf{k}}^{(L)}(\tilde{\mathbf{t}}) = \sum_{\tilde{\mathbf{n}} \geq 0} \tilde{b}_{\tilde{\mathbf{n}}} \tilde{\mathbf{t}}^{\tilde{\mathbf{n}}} = \sum_{\tilde{\mathbf{n}} \geq 0} a_{\tilde{n}_1} \cdot \dots \cdot a_{\tilde{n}_{qL-1}} \tilde{\mathbf{t}}^{\tilde{\mathbf{n}}}$$

with  $a_{\tilde{n}_i} = \tilde{n}_i^{-\nu}$ . Moreover using the mapping  $S$  from lemma C.3 we have that  $\tilde{\mathbf{k}}^{(L)}(\tilde{\mathbf{t}}) = \sum_{\mathbf{n} \geq 0} b_{\mathbf{n}} \mathbf{t}^{\mathbf{n}}$  with

$$b_{\mathbf{n}} = \sum_{\mathcal{S}} \tilde{b}_{\tilde{\mathbf{n}}} = c \sum_{\mathcal{S}} \tilde{\mathbf{n}}^{-\nu}$$

where  $\mathcal{S} = \{\tilde{n}_1, \dots, \tilde{n}_{qL-1} | \forall i = 1, \dots, d, \sum_{i=S(j)} \tilde{n}_j = n_i\}$ . Note that  $|\{i | S(i) = j\}| = p_j^{(L)}$  where  $p_j^{(L)}$  denotes the number of paths from the input pixel to the output, therefore by combining Lemma C.4 for the case of  $p_j^{(L)} \geq n_j$  and Lemma C.5 for the case of  $p_j^{(L)} \leq n_j$  we have that

$$\tilde{c}_{A,\mathbf{n}} \mathbf{n}^{-\nu} \leq b_{\mathbf{n}}$$

where  $c_{A,\mathbf{n}} = \prod_{i=1}^d c(p_i^{(L)}, n_i)$  and

$$c(p_i^{(L)}, n_i) = \begin{cases} a_0^{p_i^{(L)} - n_i} (1 + a_0)^{n_i - 1}, & n_i < p_i^{(L)} \\ (1 + a_0)^{p_i^{(L)} - 1}, & n_i \geq p_i^{(L)} \end{cases}$$

So all in all we get

$$c(p_i^{(L)}, n_i) := (1 + a_0)^{-1} a_0^{p_i^{(L)}} A^{\min(p_i^{(L)}, n_i)}$$

with  $A = 1 + \frac{1}{a_0}$ . This leads to

$$c_{A,\mathbf{n}} = c_L \prod_{i=1}^d A^{\min(p_i^{(L)}, n_i)}$$

where  $A = 1 + \frac{1}{a_0}$  and  $c_L = (1 + a_0)^{-d} \cdot a_0^{\sum_{i=1}^d p_i^{(L)}}$ . The same set of steps using lemmas C.4 and C.5 leads to the results of  $c_{B,\mathbf{n}}$   $\square$

**Lemma C.7.** Let  $\tilde{\mathbf{k}}^{(L)}$  be a stride-1 hierarchical and factorizable of fixed depth  $L$  and filter size  $q$ , where  $\tilde{\mathbf{k}}^{(L)}(\tilde{\mathbf{t}}) = \sum_{\tilde{\mathbf{n}} \geq 0} \tilde{b}_{\tilde{\mathbf{n}}} \tilde{\mathbf{t}}^{\tilde{\mathbf{n}}} = c \sum_{\tilde{\mathbf{n}} \geq 0} a_{\tilde{n}_1} \cdot \dots \cdot a_{\tilde{n}_d} \tilde{\mathbf{t}}^{\tilde{\mathbf{n}}}$  with  $a_0 > 0$ , and  $a_{n_i} = n_i^{-\nu}$  for  $\nu > 1$ . Then, the eigenvalues  $\lambda_{\mathbf{k}}$  of  $\tilde{\mathbf{k}}^{(L)}$  satisfy

$$\lambda_{\mathbf{k}} \geq c_{A,\mathbf{k}} \prod_{\substack{i=1 \\ n_i > 0}}^d k_i^{-(\zeta + 2\nu - 3)}$$

$$c_{A,\mathbf{k}} = c_L \prod_{i=1}^d A^{\min(p_i^{(L)}, k_i)},$$

with  $A = 1 + \frac{1}{a_0}$  and  $p_i^{(L)}$  denotes the number of paths from pixel  $i$  to the output of the corresponding equivariant network.

*Proof.* Using Lemma C.6 we have

$$b_{\mathbf{n}} \geq c \prod_{i=1}^d A^{\min(p_i, n_i)} n_i^{-\nu}.$$

Using Lemma 3.1 we have

$$\lambda_{\mathbf{k}} = |\mathbb{S}^{\zeta-2}|^d \sum_{\mathbf{s} \geq 0} b_{\mathbf{k}+2\mathbf{s}} \lambda_{\mathbf{k}}(\mathbf{t}^{\mathbf{k}+2\mathbf{s}}),$$

where we denote by  $\lambda_{\mathbf{k}}(\mathbf{t}^{\mathbf{k}+2\mathbf{s}}) = \prod_{i=1}^d \lambda_{k_i}(t_i^{k_i+2s_i})$ . This implies that

$$\lambda_{\mathbf{k}} \geq c |\mathbb{S}^{\zeta-2}|^d \sum_{\mathbf{s} \geq 0} \prod_{i=1}^d A^{\min(p_i, k_i+2s_i)} (k_i + 2s_i)^{-\nu} \lambda_{k_i}(t_i^{k_i+2s_i}).$$

Applying the distributive law

$$\lambda_{\mathbf{k}} \geq c |\mathbb{S}^{\zeta-2}|^d \prod_{i=1}^d \sum_{s_i \geq 0} A^{\min(p_i, k_i+2s_i)} (k_i + 2s_i)^{-\nu} \lambda_{k_i}(t_i^{k_i+2s_i}) = \prod_{i=1}^d \lambda_{k_i}(\tilde{\mathbf{k}}_i),$$

where we define the kernel  $\tilde{\mathbf{k}}_i(t)$  by the power series

$$\tilde{\mathbf{k}}_i(t) = \sum_{n_j=0}^{\infty} c^{1/d} A^{\min(p_i, n_j)} n_j^{-\nu} t^{n_j}.$$

Therefore,

$$\begin{aligned} \lambda_{\mathbf{k}} &\geq c \prod_{i=1}^d \left( \sum_{n_i=0}^{\infty} A^{\min(p_i, n_i)} n_i^{-\nu} \lambda_{k_i}(t_i^{n_i}) \right) = c \prod_{i=1}^d \left( \sum_{s_i=0}^{\infty} A^{\min(p_i, k_i+2s_i)} (k_i + 2s_i)^{-\nu} \lambda_{k_i}(t_i^{k_i+2s_i}) \right) \\ &\geq c \prod_{i=1}^d A^{\min(p_i, k_i)} \left( \sum_{s_i=0}^{\infty} (k_i + 2s_i)^{-\nu} \lambda_{k_i}(t_i^{k_i+2s_i}) \right). \end{aligned}$$

Therefore, using Theorem 3.2 we get that

$$\begin{aligned} \lambda_{\mathbf{k}} &\geq c_{A, \mathbf{k}} \prod_{\substack{i=1 \\ n_i > 0}}^d k_i^{-(\zeta+2\nu-3)} \\ c_{A, \mathbf{k}} &= c_L \prod_{i=1}^d A^{\min(p_i^{(L)}, k_i)}. \end{aligned}$$

□

## D Kernels associated with the equivariant network

In this section we prove Theorem 3.5 presented in Section 3.4.

**Theorem D.1.** *Let  $\tilde{\mathbf{k}}^{(L)}$  denote either CGPK-EqNet or CNTK-EqNet of depth  $L$  whose input includes  $\zeta$  channels, with receptive field  $\mathcal{R}$  and with ReLU activation. Then,*

1.  $\tilde{\mathbf{k}}^{(L)}$  can be written as a power series,  $\tilde{\mathbf{k}}^{(L)}(\mathbf{t}) = \sum_{\mathbf{n} \geq 0} b_{\mathbf{n}} \mathbf{t}^{\mathbf{n}}$  with

$$c_1 \prod_{i \in \mathcal{R}, n_i > 0} n_i^{-\nu_a} \leq b_{\mathbf{n}} \leq c_2 \prod_{i \in \mathcal{R}, n_i > 0} n_i^{-\nu_b},$$

2. The eigenvalues of  $\tilde{\mathbf{k}}^{(L)}$  are bounded by

$$c_3 \prod_{\substack{i \in \mathcal{R} \\ k_i > 0}} k_i^{-(\zeta+2\nu_a-3)} \leq \lambda_{\mathbf{k}} \leq c_4 \prod_{\substack{i \in \mathcal{R} \\ k_i > 0}} k_i^{-(\zeta+2\nu_b-3)},$$

where for CGPK-EqNet  $\nu_a = 2.5$  and  $\nu_b = 1 + 3/(2d)$ , while for CNTK-EqNet  $\nu_a = 2.5$  and  $\nu_b = 1 + 1/(2d)$  and  $c_1, c_2, c_3$  and  $c_4$  depend on  $L$ .

We begin by proving the lower bound for  $b_{\mathbf{n}}$  of CGPK-EqNet.

**Lemma D.2.** Let  $\mathbf{k}^{(L)}$  be a CGPK-EqNet of depth  $L$ , filter size  $q$  with ReLU activation. Then,  $\mathbf{k}^{(L)}$  can be written as a power series,  $\mathbf{k}^{(L)}(\mathbf{t}) = \sum_{\mathbf{n} \geq 0} b_{\mathbf{n}} \mathbf{t}^{\mathbf{n}}$  with

$$c_1 \mathbf{n}^{-\nu} \leq b_{\mathbf{n}},$$

where  $c_1 > 0$  is constant if the receptive field of  $\mathbf{k}^{(L)}$  includes  $\mathbf{n}$  and zero otherwise and  $\nu = 2.5$ .

*Proof.* We prove the lemma by induction on  $L$ . For  $L = 1$

$$\mathbf{k}^{(1)}(\mathbf{t}) = \kappa_1(t_1) = \sum_{n=0}^{\infty} a_n t_1^n,$$

where the equality on the right provides the power series of  $\kappa_1$ . Consequently, for  $\mathbf{n} = (n, 0, \dots, 0)$ ,  $b_{\mathbf{n}} = a_n \sim n^{-\nu}$ , and the receptive field contains only one pixel. Therefore,  $c_1$  is constant if  $\mathbf{n} = (n, 0, \dots, 0)$  and zero otherwise. For  $L > 1$  we denote  $\kappa_1(u) = \sum_{n=0}^{\infty} a_n u^n$  and  $g(\mathbf{t}) = \mathbf{k}^{L-1}(\mathbf{t}) = \sum_{\mathbf{n} \geq 0} \tilde{b}_{\mathbf{n}} \mathbf{t}^{\mathbf{n}}$  with the induction assumption that  $\tilde{b}_{\mathbf{n}} \geq c \mathbf{n}^{-\nu}$ . Then we have that

$$\begin{aligned} \mathbf{k}^L(\mathbf{t}) &= \kappa_1 \left( \frac{1}{q} \sum_{j=0}^{q-1} g(s_j \mathbf{t}) \right) = \sum_{n=0}^{\infty} \frac{a_n}{q^n} \left( \sum_{j=0}^{q-1} g(s_j \mathbf{t}) \right)^n \\ &= \sum_{n=0}^{\infty} \frac{a_n}{q^n} \sum_{|\mathbf{k}|=n} \binom{n}{\mathbf{k}} \prod_{i=0}^{q-1} g^{k_i}(s_i \mathbf{t}) \stackrel{(1)}{=} \sum_{\mathbf{k} \geq 0} \frac{a_{|\mathbf{k}|}}{q^{|\mathbf{k}|}} \binom{|\mathbf{k}|}{\mathbf{k}} \prod_{i=0}^{q-1} \left( \sum_{\mathbf{m} \geq 0} \tilde{b}_{s_{-i} \mathbf{m}} \mathbf{t}^{s_{-i} \mathbf{m}} \right)^{k_i} := \sum_{\mathbf{n} \geq 0} b_{\mathbf{n}} \mathbf{t}^{\mathbf{n}}, \end{aligned}$$

where  $(1)$  is due to the fact that  $g(s_i \mathbf{t}) = \sum_{\mathbf{m} \geq 0} \tilde{b}_{\mathbf{m}} (s_i \mathbf{t})^{\mathbf{m}} = \sum_{\mathbf{m} \geq 0} \tilde{b}_{s_{-i} \mathbf{m}} \mathbf{t}^{s_{-i} \mathbf{m}}$ . Next, using a multivariate version of the Faà di Bruno formula (see, e.g., [8]), we have that:

$$b_{\mathbf{n}} = \sum_{\mathbf{k} \geq 0} \frac{a_{|\mathbf{k}|}}{q^{|\mathbf{k}|}} \binom{|\mathbf{k}|}{\mathbf{k}} \sum_{\{\mathbf{n}_1, \dots, \mathbf{n}_q \mid \sum_{i=1}^q k_i \mathbf{n}_i = \mathbf{n}\}} \prod_{i=0}^{q-1} \hat{B}_{\mathbf{n}_i, k_i}(\dots, \tilde{b}_{s_{-i} \mathbf{m}}, \dots), \quad (5)$$

where  $\hat{B}_{\mathbf{n}, k}(\cdot)$  denote ordinary multivariate Bell polynomials defined as

$$\hat{B}_{\mathbf{n}, k}(x_{\mathbf{i}_1}, x_{\mathbf{i}_2}, \dots) = \sum_{\bar{\mathcal{J}}_{\mathbf{n}, k}} \frac{k!}{j_{\mathbf{i}_1}! j_{\mathbf{i}_2}! \dots} x_{\mathbf{i}_1}^{j_{\mathbf{i}_1}} x_{\mathbf{i}_2}^{j_{\mathbf{i}_2}} \dots$$

and  $\bar{\mathcal{J}}_{\mathbf{n}, k} = \{j_{\mathbf{i}_1} + j_{\mathbf{i}_2} + \dots = k \in \mathbb{R}; j_{\mathbf{i}_1} \mathbf{i}_1 + j_{\mathbf{i}_2} \mathbf{i}_2 + \dots = \mathbf{n} \in \mathbb{R}^d\}$ . Since all terms in (5) are non-negative, it suffices to choose one term to get a lower bound. Specifically, we choose  $\mathbf{k} = (1, 1, \dots, 1) \in \mathbb{R}^q$  and  $\mathbf{n}_1, \mathbf{n}_q$  such that  $\mathbf{n}_1 + \mathbf{n}_q = \mathbf{n}$ ,  $\mathbf{n}_1^T \mathbf{n}_q = 0$ , and  $\mathbf{n}_i = 0$  for  $i \notin \{1, q\}$ . Noting that  $|\mathbf{k}| = q$ ,  $\hat{B}_{\mathbf{n}_1, 1} = \tilde{b}_{\mathbf{n}_1}$  and  $\hat{B}_{\mathbf{n}_q, 1} = \tilde{b}_{\mathbf{n}_q}$ , and  $\hat{B}_{0, 1} = b_0$ , we obtain

$$b_{\mathbf{n}} \geq \frac{a_q}{q^q} q! \tilde{b}_0^{q-2} \tilde{b}_{\mathbf{n}_1} \tilde{b}_{\mathbf{n}_q} = C_q \tilde{b}_{\mathbf{n}_1} \tilde{b}_{\mathbf{n}_q} \geq^{(1)} C_q c^2 \mathbf{n}^{-\nu},$$

where  $C_q = \frac{q^q}{q!} a_q \tilde{b}_0^{q-2}$  and  $(1)$  is due to the induction hypothesis.  $\square$

**Corollary D.3.** The bound in Lemma D.2 holds also for CNTK-EqNet.

*Proof.* Let  $\mathbf{k}^{(L)}$  be a CNTK-EqNet. Denote by  $b_{\mathbf{n}}(\mathbf{k}^{(L)})$  as the power series coefficients of  $\mathbf{k}^{(L)}$ . Then, by definition,

$$\begin{aligned} \Sigma_{i,j}^{(l)}(\mathbf{x}, \mathbf{z}) &= \kappa_1 \left( \frac{1}{q} \sum_{r=0}^{q-1} \tilde{\Sigma}_{i+r, j+r}^{(l-1)}(\mathbf{x}, \mathbf{z}) \right) \\ \Theta_{i,j}^{(l)}(\mathbf{x}, \mathbf{z}) &= \frac{1}{q} \sum_{r=0}^{q-1} \left[ \kappa_0 \left( \tilde{\Sigma}_{i+r, j+r}^{(l-1)}(\mathbf{x}, \mathbf{z}) \right) \tilde{\Theta}_{i+r, j+r}^{(l-1)}(\mathbf{x}, \mathbf{z}) + \tilde{\Sigma}_{i+r, j+r}^{(l)}(\mathbf{x}, \mathbf{z}) \right], \end{aligned}$$

Since  $\kappa_0$  and  $\kappa_1$  have only positive power series coefficients it holds that  $b_{\mathbf{n}}(\mathbf{k}^{(L)}) = b_{\mathbf{n}}(\Theta_{i,i}^{(L)}) \geq \frac{c_{\alpha}}{q} b_{\mathbf{n}}(\tilde{\Sigma}_{i,i}^{(L)})$ . Note that  $\tilde{\Sigma}_{i,i}^{(L)}$  is the CGPK-EqNet of  $L$  layers and therefore we can apply the lower bound of Lemma D.2 to get  $b_{\mathbf{n}}(\mathbf{k}^{(L)}) \geq \frac{c_{\alpha}}{q} c_1 \mathbf{n}^{-\nu}$ .  $\square$

Next we give a general upper bound. We will use the following lemma: To prove the above lemma we will use the following supporting lemma

**Lemma D.4.** *Let  $\mathbf{k}^{(L)}(\mathbf{t})$  be either CGPK-EqNet or CNTK-EqNet of depth  $L$  with filter size  $q$ . Let  $K_L^{FC}(u)$  be a fully connected kernel (NTK or GPK receptively) of one variable  $u$ . Then, plugging  $t_1 = t_2 = \dots = t_i = u$  to  $\mathbf{k}^{(L)}(\mathbf{t})$  gives that  $\mathbf{k}^{(L)}(\mathbf{t}) = K_L^{FC}(u)$ , where  $K_L^{FC}(u)$  denotes the corresponding CGPK or CNTK kernel of depth  $L$  for a fully connected network.*

*Proof.* We prove the lemma for CGPK. The proof for CNTK is similar. We perform induction on  $L$ . For  $L = 1$  the claim is trivial. For  $L > 1$  plugging  $t_1 = \dots = t_i = u$  to  $\mathbf{k}^{(L)}(\mathbf{t})$  together with the induction hypothesis gives us

$$\begin{aligned}\mathbf{k}^{(L)}(\mathbf{t}) &= \kappa_1 \left( \frac{c_\sigma}{q} \sum_{j=0}^{q-1} \mathbf{k}^{(L-1)}(s_j \mathbf{t}) \right) \\ &= \kappa_1 \left( \frac{c_\sigma}{q} \sum_{j=0}^{q-1} K_{L-1}^{FC}(u) \right) = \kappa_1(K_{L-1}^{FC}(u)) = K_L^{FC}(u).\end{aligned}$$

□

**Lemma D.5.** *Let  $\mathbf{k}^{(L)}$  be either CNTK-EqNet or CGPK-EqNet of depth  $L$  with filter size  $q$  and ReLU activation. Then,  $\mathbf{k}^{(L)}$  can be written as a power series,  $\mathbf{k}^{(L)}(\mathbf{t}) = \sum_{\mathbf{n} \geq 0} b_{\mathbf{n}} \mathbf{t}^{\mathbf{n}}$ , with,  $\sum_{|\mathbf{n}|=k} b_{\mathbf{n}} = \Theta(a_k)$  where  $a_k = k^{-\nu}$  with  $\nu = 2.5$  for CGPK and  $\nu = 1.5$  for CNTK.*

*Proof.* Let  $\kappa(t) = \sum_{n=0}^{\infty} a_n t^n$ . Using results by [3] (Theorem 8) we have that  $K_L^{FC}(t) = \sum_{n=0}^{\infty} \tilde{a}_n t^n$  where  $K_L^{FC}(t)$  is the NTK or GPK model for a FC network and  $\tilde{a}_n = \Theta(n^{-\nu})$  for  $\nu = 2.5, \nu = 1.5$  for GPK and NTK respectively. Moreover, we have that

$$\mathbf{k}^{(L)}(\mathbf{t}) = \sum_{\mathbf{n} \geq 0} b_{\mathbf{n}} \mathbf{t}^{\mathbf{n}}.$$

This, together with Lemma D.4 and plugging  $t_1 = t_2 = \dots = t_l = u$ , yields

$$\mathbf{k}^{(L)}(\mathbf{t}) = \sum_{\mathbf{n}} b_{\mathbf{n}} \mathbf{t}^{\mathbf{n}} = \sum_{\mathbf{n}} b_{\mathbf{n}} u^{|\mathbf{n}|} = \sum_{k=0}^{\infty} u^k \sum_{|\mathbf{n}|=k} b_{\mathbf{n}}.$$

The uniqueness of power series further implies

$$\sum_{|\mathbf{n}|=k} b_{\mathbf{n}} = \tilde{a}_k = \Theta(k^{-\nu}),$$

which concludes the proof. □

Next we upper bound  $b_{\mathbf{n}}$  (Lemma D.7). We begin with a simple supporting lemma

**Lemma D.6.** *For any  $d \geq 1$  positive (even) numbers  $c_1, \dots, c_d \geq 1$ , denote the two set of indices*

$$\begin{aligned}I_1 &= \{(i_1, \dots, i_d) \in \mathbb{N}_+ \times \dots \times \mathbb{N}_+ | c_k/2 \leq i_k \leq c_k\} \\ I_2 &= \{(i_1, \dots, i_d) \in \mathbb{N}_+ \times \dots \times \mathbb{N}_+ | (i_1 + \dots + i_d) \in [c_1/2 + \dots + c_d/2, c_1 + \dots + c_d]\}.\end{aligned}$$

*Then  $I_1 \subseteq I_2$ .*

*Proof.* Let  $(i_1, \dots, i_d) \in I_1$ . Then,

$$c_1/2 + \dots + c_d/2 \leq i_1 + \dots + i_d \leq c_1 + \dots + c_d,$$

implying that  $(i_1, \dots, i_d) \in I_2$ . □

**Lemma D.7.** *Let  $\mathbf{k}(\mathbf{t}) = \sum_{\mathbf{n} \geq 0} b_{\mathbf{n}} \mathbf{t}^{\mathbf{n}}$  such that  $\sum_{|\mathbf{n}|=n} b_{\mathbf{n}} = a_n \sim n^{-\nu}$  with  $\nu > 1$ . Then, there exists  $c > 0$  such that  $b_{\mathbf{n}} \leq c n^{-(\frac{\nu-1}{d}+1)}$ . The implication for CNTK-EqNet ( $\nu = 1.5$ ) and for CGPK-EqNet ( $\nu = 2.5$ ) can appear in a separate lemma.*

*Proof.* Let  $n_1, \dots, n_d \gg 1$  be large enough and denote by  $\bar{n} = \sum_{j=1}^d n_j$ . Denote by  $a_k = c \cdot k^{-\nu}$ . By Lemma D.5 we have that  $\sum_{|\mathbf{n}|=k} b_{\mathbf{n}} \leq C a_k$ . Therefore,

$$\sum_{k=\bar{n}/2}^{\bar{n}} \left( \sum_{|\mathbf{n}|=k} b_{\mathbf{n}} \right) = \sum_{|\mathbf{n}|=\bar{n}/2}^{\bar{n}} b_{\mathbf{n}} \leq C \sum_{k=\bar{n}/2}^{\bar{n}} a_k.$$

Here we can estimate the RHS using an integral and get

$$\sum_{k=\bar{n}/2}^{\bar{n}} a_k \approx \int_{\bar{n}/2}^{\bar{n}} \frac{1}{x^\nu} dx = (\nu - 1)(2^{(\nu-1)} - 1)\bar{n}^{-(\nu-1)}.$$

on the other hand, by denoting

$$\begin{aligned} I_1 &= \{\bar{\mathbf{n}} \in \mathbb{N}_+ \times \dots \times \mathbb{N}_+ | n_j/2 \leq \bar{n}_j \leq n_j\} \\ I_2 &= \{\bar{\mathbf{n}} \in \mathbb{N}_+ \times \dots \times \mathbb{N}_+ | |\bar{\mathbf{n}}| \in [n_1/2 + \dots + n_d/2, n_1 + \dots + n_d]\}, \end{aligned}$$

by Lemma D.6 and because  $b_{\mathbf{n}} \geq 0$  we have that

$$\sum_{\mathbf{n} \in I_1} b_{\mathbf{n}} \leq \sum_{\mathbf{n} \in I_2} b_{\mathbf{n}} = \sum_{|\mathbf{n}|=\bar{n}/2}^{|\mathbf{n}|=\bar{n}} b_{\mathbf{n}} \leq C \sum_{k=\bar{n}/2}^{\bar{n}} a_k$$

Moreover  $|I_1| = \frac{1}{2^d} n_1 \cdot \dots \cdot n_d$  and the smallest element in the sum is  $\min_{\mathbf{n} \in I_1} \{b_{\mathbf{n}}\} = b_{n_1, \dots, n_d}$ . Therefore,

$$\frac{1}{2^d} n_1 \cdot \dots \cdot n_d b_{n_1, \dots, n_d} \leq \sum_{\mathbf{n} \in I_1} b_{\mathbf{n}} \leq (\nu - 1)(2^{(\nu-1)} - 1)\bar{n}^{-(\nu-1)},$$

implying that

$$b_{n_1, \dots, n_d} \leq \frac{(\nu - 1)(2^{(\nu-1)} - 1)(n_1 + \dots + n_d)^{-(\nu-1)}}{\frac{1}{2^d} (n_1 \cdot \dots \cdot n_d)}.$$

Now applying the inequality of means we obtain  $(n_1 + \dots + n_d)/d \geq (n_1 \cdot \dots \cdot n_d)^{\frac{1}{d}}$ , and we finally get that

$$b_{n_1, \dots, n_d} \leq d 2^d (\nu - 1)(2^{(\nu-1)} - 1)(n_1 \cdot \dots \cdot n_d)^{-\left(\frac{\nu-1}{d} + 1\right)}.$$

□

## E Trace and GAP kernels

In this section we prove results presented in Section 3.5. We prove Theorem 3.7.

**Theorem E.1.** *Let  $\tilde{\mathbf{k}}$  be a multi-dot-product kernel with Mercer's decomposition as in (1), and let  $\mathbf{k}^{\text{Tr}}$  and  $\mathbf{k}^{\text{GAP}}$  respectively be its trace and GAP versions. Then,*

1.  $\mathbf{k}^{\text{Tr}}(\mathbf{x}, \mathbf{z}) = \sum_{\mathbf{k}, \mathbf{j}} \lambda_{\mathbf{k}}^{\text{Tr}} Y_{\mathbf{k}, \mathbf{j}}(\mathbf{x}) Y_{\mathbf{k}, \mathbf{j}}(\mathbf{z})$  with

$$\lambda_{\mathbf{k}}^{\text{Tr}} = \frac{1}{d} \sum_{i=0}^{d-1} \lambda_{s_i \mathbf{k}} \quad (6)$$

Where  $\lambda_{\mathbf{k}}$  denote the eigenvalues of  $\tilde{\mathbf{k}}$ .

2.  $\mathbf{k}^{\text{GAP}}(\mathbf{x}, \mathbf{z}) = \sum_{\mathbf{k}, \mathbf{j}} \lambda_{\mathbf{k}}^{\text{Tr}} \tilde{Y}_{\mathbf{k}, \mathbf{j}}(\mathbf{x}) \tilde{Y}_{\mathbf{k}, \mathbf{j}}(\mathbf{z})$  with

$$\tilde{Y}_{\mathbf{k}, \mathbf{j}}(\mathbf{x}) = \frac{1}{\sqrt{d}} \sum_{i=0}^{d-1} Y_{s_i \mathbf{k}, s_{i\mathbf{j}}}(\mathbf{x}).$$

*Proof.* (1) Let  $\mathbf{k}^{\text{Tr}}(\mathbf{x}, \mathbf{z})$  be a trace kernel. By definition

$$\mathbf{k}^{\text{Tr}}(\mathbf{x}, \mathbf{z}) = \frac{1}{d} \sum_{i=0}^{d-1} \tilde{\mathbf{k}}(s_i \mathbf{x}, s_i \mathbf{z}),$$

where  $\tilde{\mathbf{k}}$  is a multi-dot-product kernel, with Mercer's decomposition

$$\tilde{\mathbf{k}}(\mathbf{x}, \mathbf{z}) = \sum_{\mathbf{k}, \mathbf{j}} \lambda_{\mathbf{k}} Y_{\mathbf{k}, \mathbf{j}}(\mathbf{x}) Y_{\mathbf{k}, \mathbf{j}}(\mathbf{z}).$$

Note that  $\tilde{\mathbf{k}}(s_i \mathbf{x}, s_i \mathbf{z})$  has the same eigenfunctions as  $\tilde{\mathbf{k}}(\mathbf{x}, \mathbf{z})$  with eigenvalues  $\lambda_{s_i \mathbf{k}}$ . So we get

$$\begin{aligned} \mathbf{k}^{\text{Tr}}(\mathbf{x}, \mathbf{z}) &= \frac{1}{d} \sum_{i=0}^{d-1} \tilde{\mathbf{k}}(s_i \mathbf{x}, s_i \mathbf{z}) = \frac{1}{d} \sum_{i=0}^{d-1} \sum_{\mathbf{k}, \mathbf{j}} \lambda_{s_i \mathbf{k}} Y_{\mathbf{k}, \mathbf{j}}(\mathbf{x}) Y_{\mathbf{k}, \mathbf{j}}(\mathbf{z}) \\ &= \sum_{\mathbf{k}, \mathbf{j}} \frac{1}{d} \sum_{i=0}^{d-1} \lambda_{s_i \mathbf{k}} Y_{\mathbf{k}, \mathbf{j}}(\mathbf{x}) Y_{\mathbf{k}, \mathbf{j}}(\mathbf{z}) = \sum_{\mathbf{k}, \mathbf{j}} Y_{\mathbf{k}, \mathbf{j}}(\mathbf{x}) Y_{\mathbf{k}, \mathbf{j}}(\mathbf{z}) \frac{1}{d} \sum_{i=0}^{d-1} \lambda_{s_i \mathbf{k}}. \end{aligned}$$

Therefore, we have

$$\lambda_{\mathbf{k}}^{\text{Tr}} = \frac{1}{d} \sum_{i=0}^{d-1} \lambda_{s_i \mathbf{k}}.$$

(2) Let  $\mathbf{k}^{\text{GAP}}(\mathbf{x}, \mathbf{z})$  be GAP kernel. By definition we have that

$$\mathbf{k}^{\text{GAP}}(\mathbf{x}, \mathbf{z}) = \frac{1}{d^2} \sum_{i=0}^{d-1} \sum_{j=0}^{d-1} \tilde{\mathbf{k}}(s_i \mathbf{x}, s_j \mathbf{z})$$

Where  $\tilde{\mathbf{k}}$  is a multi-dot-product kernel. Using Mercer's decomposition (1), we have

$$\tilde{\mathbf{k}}(s_i \mathbf{x}, s_j \mathbf{z}) = \sum_{\mathbf{k}, \mathbf{j}} \lambda_{\mathbf{k}} Y_{\mathbf{k}, \mathbf{j}}(s_i \mathbf{x}) Y_{\mathbf{k}, \mathbf{j}}(s_j \mathbf{z}) = \sum_{\mathbf{k}, \mathbf{j}} \lambda_{\mathbf{k}} Y_{s_{-i} \mathbf{k}, s_{-i} \mathbf{j}}(\mathbf{x}) Y_{s_{-j} \mathbf{k}, s_{-j} \mathbf{j}}(\mathbf{z}).$$

Therefore,

$$\begin{aligned} \mathbf{k}^{\text{GAP}}(\mathbf{x}, \mathbf{z}) &= \frac{1}{d^2} \sum_{i=0}^{d-1} \sum_{j=0}^{d-1} \tilde{\mathbf{k}}(s_i \mathbf{x}, s_j \mathbf{z}) = \frac{1}{d^2} \sum_{i=0}^{d-1} \sum_{j=0}^{d-1} \sum_{\mathbf{k}, \mathbf{j}} \lambda_{\mathbf{k}} Y_{s_{-i} \mathbf{k}, s_{-i} \mathbf{j}}(\mathbf{x}) Y_{s_{-j} \mathbf{k}, s_{-j} \mathbf{j}}(\mathbf{z}) \\ &= \sum_{\mathbf{k}, \mathbf{j}} \frac{1}{d^2} \lambda_{\mathbf{k}} \sum_{i=0}^{d-1} \sum_{j=0}^{d-1} Y_{s_{-i} \mathbf{k}, s_{-i} \mathbf{j}}(\mathbf{x}) Y_{s_{-j} \mathbf{k}, s_{-j} \mathbf{j}}(\mathbf{z}) \\ &= \sum_{\mathbf{k}, \mathbf{j}} \frac{1}{d^2} \lambda_{\mathbf{k}} \left( \sum_{i=0}^{d-1} Y_{s_{-i} \mathbf{k}, s_{-i} \mathbf{j}}(\mathbf{x}) \right) \left( \sum_{j=0}^{d-1} Y_{s_{-j} \mathbf{k}, s_{-j} \mathbf{j}}(\mathbf{z}) \right). \end{aligned}$$

We can denote  $\tilde{Y}_{\mathbf{k}, \mathbf{j}}(\mathbf{x}) = \frac{1}{\sqrt{d}} \sum_{i=0}^{d-1} Y_{s_i \mathbf{k}, s_i \mathbf{j}}(\mathbf{x})$ . Note that  $\tilde{Y}_{\mathbf{k}, \mathbf{j}}(\mathbf{x})$  is invariant to all circular shifts of indices. So we further denote by  $\mathbf{k}/S$  the set of indices  $\mathbf{k}$  modulu the set of circular shifts  $s_0, s_1, \dots, s_{d-1}$  and write the last expression as

$$\begin{aligned} \mathbf{k}^{\text{GAP}}(\mathbf{x}, \mathbf{z}) &= \sum_{\mathbf{k}} \sum_{\mathbf{j}} \frac{1}{d} \lambda_{\mathbf{k}} \tilde{Y}_{\mathbf{k}, \mathbf{j}}(\mathbf{x}) \tilde{Y}_{\mathbf{k}, \mathbf{j}}(\mathbf{z}) = \sum_{\mathbf{k}/S} \sum_{\mathbf{j}/S} \left( \frac{1}{d} \sum_{i=0}^{d-1} \lambda_{s_i \mathbf{k}} \right) \tilde{Y}_{\mathbf{k}, \mathbf{j}}(\mathbf{x}) \tilde{Y}_{\mathbf{k}, \mathbf{j}}(\mathbf{z}) \\ &= \sum_{\mathbf{k}/S} \sum_{\mathbf{j}/S} \lambda_{\mathbf{k}}^{\text{Tr}} \tilde{Y}_{\mathbf{k}, \mathbf{j}}(\mathbf{x}) \tilde{Y}_{\mathbf{k}, \mathbf{j}}(\mathbf{z}). \end{aligned}$$

We conclude that the eigenfunctions are  $\tilde{Y}_{\mathbf{k}, \mathbf{j}}(\mathbf{x})$ , and the eigenvalues are the same as  $\lambda^{\text{Tr}}$ . Moreover, note that for any  $\mathbf{k}, \mathbf{k}'$  such that  $\forall i, \mathbf{k} \neq s_i \mathbf{k}'$  it holds that  $\forall i Y_{\mathbf{k}, \mathbf{j}}(\mathbf{x}) \perp Y_{s_i \mathbf{k}', \mathbf{j}}(\mathbf{x})$ . Therefore,  $\tilde{Y}_{\mathbf{k}, \mathbf{j}}(\mathbf{x}) \perp \tilde{Y}_{\mathbf{k}', \mathbf{j}}(\mathbf{x})$ , implying that  $\{\tilde{Y}_{\mathbf{k}, \mathbf{j}}(\mathbf{x})\}$  form an orthonormal basis.  $\square$

## References

- [1] Douglas Azevedo and Valdir A Menegatto. Eigenvalues of dot-product kernels on the sphere. *Proceeding Series of the Brazilian Society of Computational and Applied Mathematics*, 3(1), 2015.
- [2] Alberto Bietti and Francis Bach. Deep equals shallow for relu networks in kernel regimes. *arXiv preprint arXiv:2009.14397*, 2020.
- [3] Lin Chen and Sheng Xu. Deep neural tangent kernel and laplace kernel have the same rkhs. *arXiv preprint arXiv:2009.10683*, 2020.
- [4] Abdallah Dhahri. Multi-variable orthogonal polynomials. *arXiv preprint arXiv:1401.5434*, 2014.
- [5] Philippe Flajolet and Robert Sedgewick. *Analytic combinatorics*. cambridge University press, 2009.
- [6] Helmut Groemer. *Geometric applications of Fourier series and spherical harmonics*, volume 61. Cambridge University Press, 1996.
- [7] Claus Müller. *Analysis of spherical symmetries in Euclidean spaces*, volume 129. Springer Science & Business Media, 2012.
- [8] Aidan Schumann. Multivariate bell polynomials and derivatives of composed functions. *arXiv preprint arXiv:1903.03899*, 2019.
- [9] Alex J Smola, Zoltan L Ovari, Robert C Williamson, et al. Regularization with dot-product kernels. *Advances in neural information processing systems*, pages 308–314, 2001.
